# Supplementary material for: Enhanced gas sensing performance of perovskite YFe1−xMnxO3 by doping manganese ions
Source: Royal Society of Chemistry journal article supplement (doi:10.1039/d0ra01375g), 2020-01-01
Supplement: d0ra01375g1.pdf [file d0ra01375g1.pdf]

## Supporting materials

### Enhanced gas sensing performance of perovskite $\text{YFe}_{1-x}\text{Mn}_x\text{O}_3$ by doping manganese ions

Aerzigu Xukeer,<sup>a</sup> Zhaofeng Wu,<sup>a\*</sup> Qihua Sun,<sup>a</sup> Furu Zhong,<sup>b</sup> Min Zhang<sup>a</sup>, Mengqiu Long,<sup>c</sup> Haiming Duan<sup>a\*</sup>

<sup>a</sup> School of Physics Science and Technology, Xinjiang University, Urumqi, Xinjiang 830046, P. R. China

<sup>b</sup> School of Physics and Electronic Science, Zunyi Normal College, Zunyi, 563006, Guizhou, P. R. China

<sup>c</sup> Institute of Super-microstructure and Ultrafast Process in Advanced Materials, School of Physics and Electronics, Central South University, Changsha 410083, P. R. China

E-mail: [wuzf@xju.edu.cn](mailto:wuzf@xju.edu.cn) (Z. Wu), [dhm@xju.edu.cn](mailto:dhm@xju.edu.cn) (H. Duan)

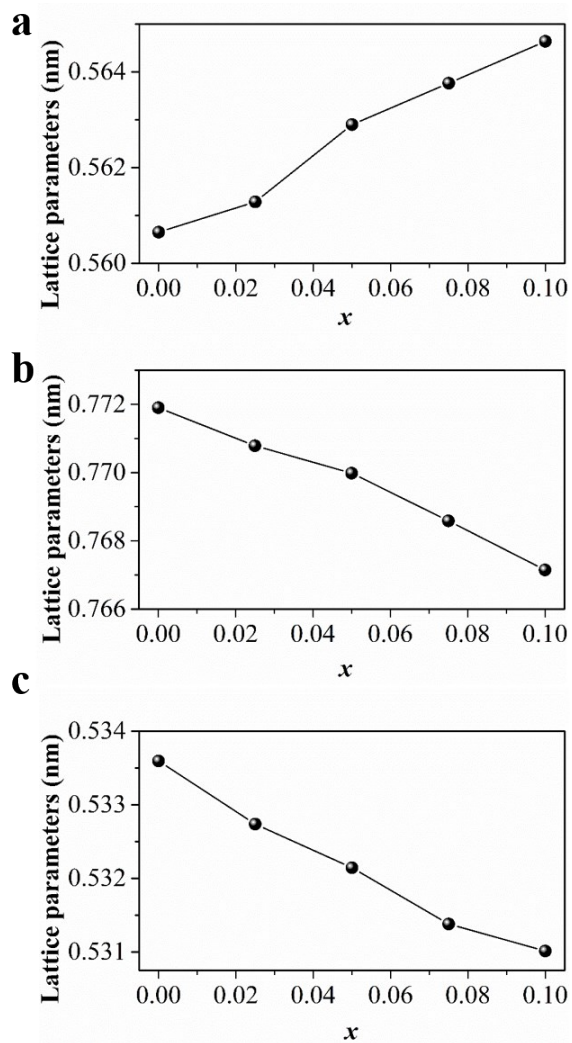

**Fig. S1.** Lattice parameters (a)  $a$ , (b)  $b$ , (c)  $c$ , of  $\text{YFe}_{1-x}\text{Mn}_x\text{O}_3$  materials as a function of  $x$  in  $\text{YFe}_{1-x}\text{Mn}_x\text{O}_3$ .

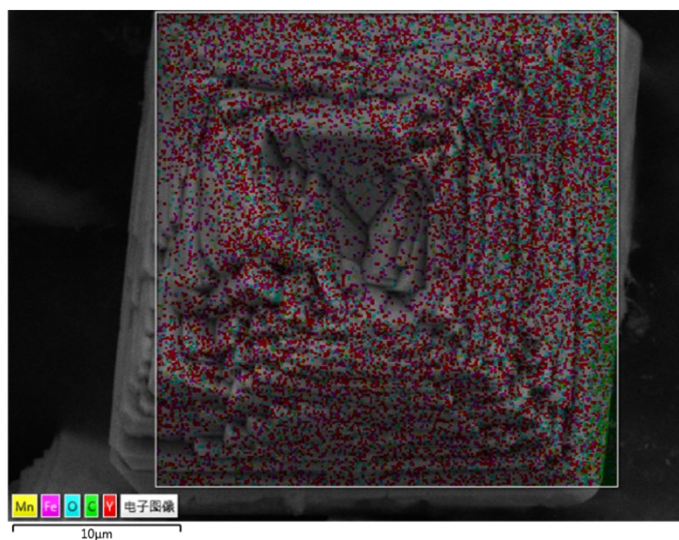

**Fig. S2.** Original SEM image selected for the EDS mapping.

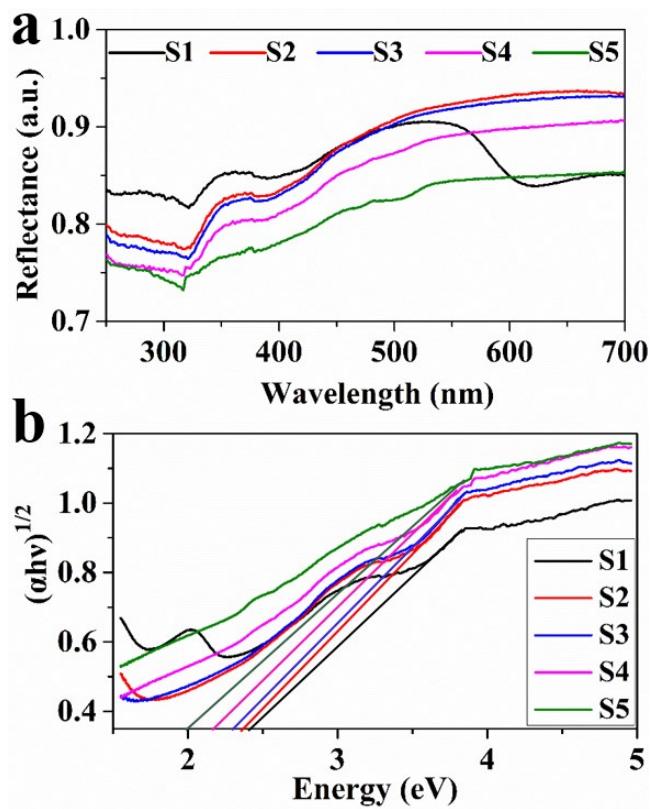

**Fig. S3.** (a) UV-vis diffuse reflectance spectra (DRS), (b) the plot of transformed Kubelka-Munk function versus the energy of light.

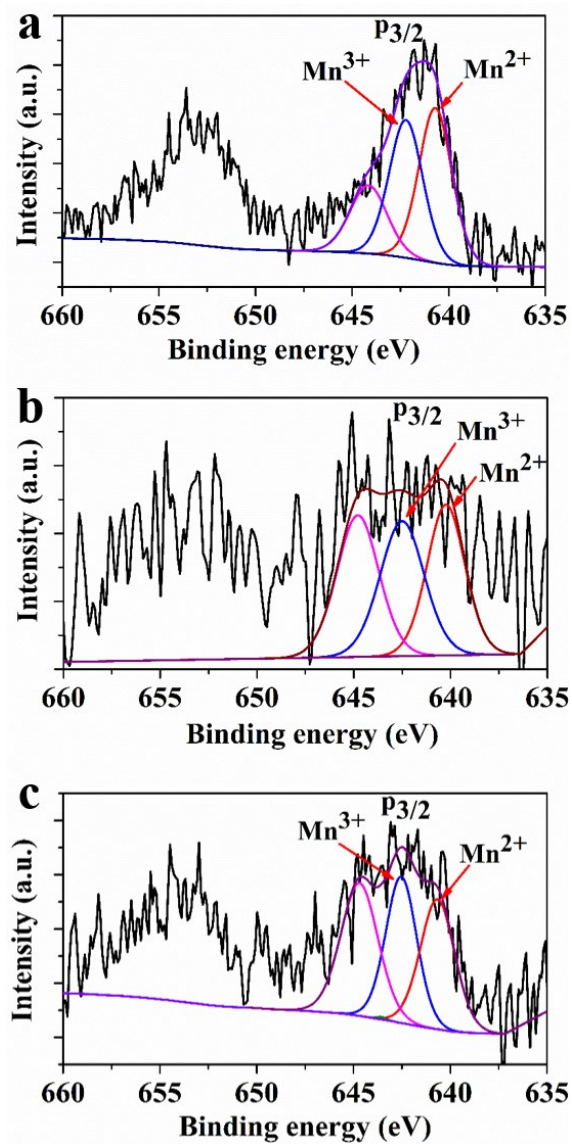

**Fig. S4.** Mn2p and its Gaussian fitting for (a)  $\text{YFe}_{0.975}\text{Mn}_{0.025}\text{O}_3$  (S2), (b)  $\text{YFe}_{0.925}\text{Mn}_{0.075}\text{O}_3$  (S4), (c)  $\text{YFe}_{0.9}\text{Mn}_{0.1}\text{O}_3$  (S5).

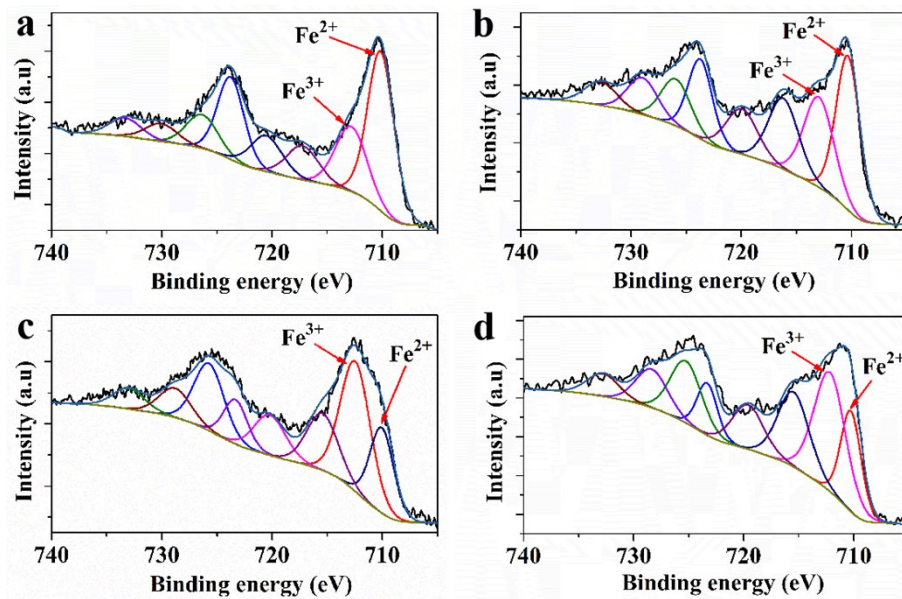

**Fig. S5.** Fe2p and its Gaussian fitting for (a)  $\text{YFeO}_3$  (S1), (b)  $\text{YFe}_{0.975}\text{Mn}_{0.025}\text{O}_3$  (S2), (c)  $\text{YFe}_{0.925}\text{Mn}_{0.075}\text{O}_3$  (S4), (d)  $\text{YFe}_{0.9}\text{Mn}_{0.1}\text{O}_3$  (S5).

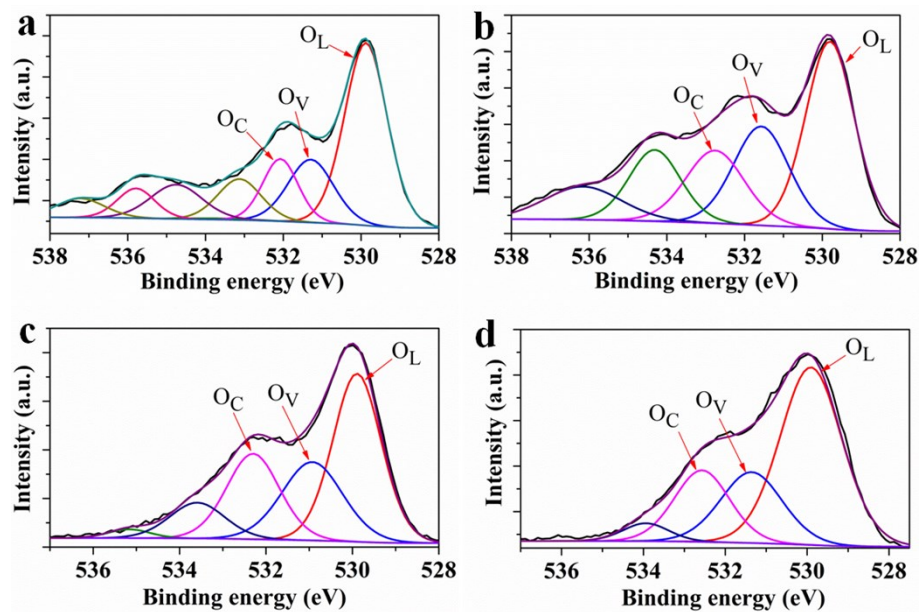

**Fig. S6.** O1s peaks together with Gaussian fitting for (a)  $\text{YFeO}_3$  (S1), (b)  $\text{YFe}_{0.975}\text{Mn}_{0.025}\text{O}_3$  (S2), (c)  $\text{YFe}_{0.925}\text{Mn}_{0.075}\text{O}_3$  (S4), (d)  $\text{YFe}_{0.9}\text{Mn}_{0.1}\text{O}_3$  (S5).

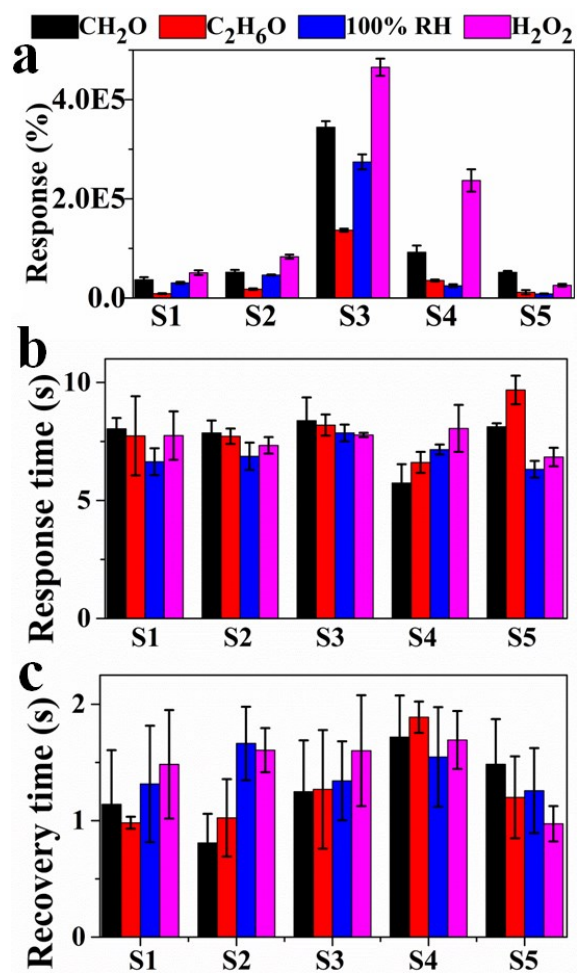

**Fig. S7.** (a) the average response, (b) response time (c) recovery time of five sensors based on  $\text{YFe}_{1-x}\text{Mn}_x\text{O}_3$  to 1000 ppm of  $\text{CH}_2\text{O}$ ,  $\text{C}_2\text{H}_6\text{O}$  and  $\text{H}_2\text{O}_2$  vapor and 100% RH.
